# Supplementary material
Source: PubMed Central journal article supplement (PMC3081076)
Supplement: supp_92_2_233__1.pdf [file supp_92_2_233__1.pdf]

| Helicase         | Motif Ia               | Motif Ib          | Motif II  | Motif III | Motif IV  | Motif V                    | Motif VI          |
|------------------|------------------------|-------------------|-----------|-----------|-----------|----------------------------|-------------------|
|                  | * * *                  | * *               | ** *      | ***       | *         | * * *                      | * ** *            |
| <b>GBV-Amys</b>  | YREAPLYLPTGSGKSTR-IP   | HRVLVLNPSIATVVRAM | VVICDECH  | LLFATATPP | LLFCHSKVE | CVCATDALSTGFTG-NFDTVT      | TVPAPAE LRSQRRGR  |
| <b>GBV-Atri</b>  | FTEAPLYLPTGSGKSTR-IP   | HKVLVLNPSIATVVRAM | IVICDECH  | LLFATATPP | LLFCHSKVE | CVCATDALSTGYTG-GFSTVT      | TTPAPAE LRAQRRGR  |
| <b>GBV-Alab</b>  | YREAPLYLPTGSGKSTR-IP   | HKVLVLNPSIATVVRAM | VVICDECH  | LLFATATPP | LLFCHSKVE | CVCATDALSTGYSG-NFDSVT      | TVPAPAE LRMQRRGR  |
| <b>GBV-A</b>     | YREAPLFLPTGAGKSTR-VP   | HKVLVLNPSIATVVRAM | VVICDELH  | LLFATATPP | LLFCHSKVE | CVCATDALSTGYTG-NFDTVT      | TVPAPAE LRAQRRGR  |
| <b>GBV-B</b>     | YSVQILIAPTGSGKSTK-LP   | YEVVLVLPNSVATTASM | VVICDECH  | VVLATATPP | LIFEATKKH | VVATDALCTGYTG-DFDSVY       | VCGVSAIVKQRRGR    |
| <b>GBV-C gt1</b> | FKEAPLFMPTGAGKSTR-VP   | HKVLILNPSVATVVRAM | VVICDECH  | VLYATATPP | LVFCHSKAE | VVCATDALSTGYTG-NFDSVT      | TVPASAE LSMQRRGR  |
| <b>GBV-C gt2</b> | FKEAPLFMPTGAGKSTR-VP   | HKVLILNPSVATVVRAM | VVICDECH  | VLYATATPP | LVFCHSKAE | VVCATDALSTGYTG-NFDSVT      | TVPASAE LSMQRRGR  |
| <b>GBV-C gt3</b> | K-EAPLFMPTGAGKSTR-VP   | HKVLILNPSVATVVRAM | VVICDECH  | VLYATATPP | LVFCHSKAE | VVCATDALSTGYTG-NFDSVT      | TVPASAE LSMQRRGR  |
| <b>GBV-C gt4</b> | FKEALLFIPTGPGKSIR-VP   | HKVLILNPSVATVVRAM | VVICDECH  | VLYATATPP | LVFCHSKAE | VVCATDALSTGYTG-NFDSVT      | TVPASAE LSMQRRGR  |
| <b>GBV-C gt5</b> | FKEAPLFMPTGAGKSTR-VP   | HKVLILNPSVATVVRAM | VVICDECH  | VLYATATPP | LVFCHSKAE | VVCATDALSTGYTG-NFDSVT      | TVPASAE LSMQRRGR  |
| <b>GBV-Ccpz</b>  | FKEAPLFLPTGSGKSTR-IP   | HKVLILNPSVATVRKM  | VVICDECH  | VLYATATPP | LVFCHSKAE | VVCATDALSTGYSG-NFDSVT      | TVPASAE LSMQRRGR  |
| <b>GBV-D</b>     | FVEAPLFVPTGSGKSTK-IP   | HNVLVINPSVATTMAM  | VVICDEAH  | VLYATATPA | LVFCHSKEL | VVATDALMTGYTG-DFDTVT       | SGPATADVRMQRRGR   |
| <b>HCV gt1</b>   | VAHL--HAPTSGSGKSTK-VP  | YKVLVLNPSVAATLGF  | IIICDECH  | VVLATATPP | LIFCHSKKK | VVATDALMTGYTG-DFDSVI       | TLPQDAVSR TQRRGR  |
| <b>HCV gt2</b>   | VGYL--HAPTSGSGKSTK-VP  | YKVLVLNPSVAATLGF  | IIICDECH  | TVLATATPP | LIFCHSKKK | VVATDALMTGYTG-DFDSVI       | TVPQDAVSR S QRRGR |
| <b>HCV gt3</b>   | VGYL--HAPTSGSGKSTK-VP  | YNVLVLNPSVAATLGF  | VIIICDECH | TVLATATPP | LIFCHSKKK | VVCATDALMTGFTG-DFDSVI      | TAPQDAVSR S QRRGR |
| <b>HCV gt4</b>   | VAHL--HAPTSGSGKSTK-VP  | YKVLVLNPSVAATLGF  | IIICDECY  | TVLATATPP | LIFCHSKKK | VVCATDALMTGFTG-DFDSVI      | TVPQDAVSR S QRRGR |
| <b>HCV gt5</b>   | VGHL--HAPTSGSGKSTK-VP  | YKVLVLNPSVAATFGF  | VIIICDECH | VVLATAIPP | LIFCHSKKK | VVCSTDALMTGFTG-DFDSVI      | TVPQDAVSR S QRRGR |
| <b>HCV gt6</b>   | VGYL--HAPTSGSGKSTR-VP  | YKVLVLNPSVAATLSF  | IIICDECH  | TVLPTATPP | LIFCHSKKK | VVCATDALMTGYTG-DFDSVI      | TVPQDAVSR S QRRGR |
| <b>DV2</b>       | LTIM--DLHPGAGKTKRYLP   | LRTLILAPTRVVAEM   | LIIMDEAH  | GIFMTATPP | VWVPSIKA  | FVDTTDISEMGANF-KAERVI      | THSSAA-QRRGRIGR   |
| <b>JEV</b>       | MTVL--DLHPGSGKTRKILP   | LRTAVLAPTRVVAEM   | LFVMDEAH  | AIFMTATPP | VWVVASVKM | FVITTDISEMGANF-GASRVI      | SPITSA-SAAQRRGR   |
| <b>WNV</b>       | ITVL--DLHPGAGKTRRILP   | LRTAVLAPTRVVAEM   | LFVMDEAH  | AIFMTATPP | VWVPSVKM  | FVITTDISEMGANF-KASRVI      | SAVTAA-SAAQRRGR   |
| <b>YFV</b>       | TTIL--DFHPGAGKTRRFLP   | LRTLVLAPTRVVLSEM  | VIIMDEAH  | TILMTATPP | AWFLPSIRA | FILATDIAEMGANL-CVERVL      | SASSAA-QRRGRIGR   |
| <b>TBEV</b>      | ITVL--DMHPGSGKTHRVL P  | LRTLVLAPTRVVLKEM  | VAIMDEAH  | LVLMTATPP | AWFVPSIAK | FVVTTDISEMGANL-DVSRVI      | TTASAA-QRRGRVGR   |
| <b>HogCV</b>     | FRQI--TLATGAGKTTE-LP   | KRVLVLIPLRAAAESV  | FIFLDEYH  | VVAMTATPA | LVFVPTRNM | -VVATNAIESGVTL PDL D V V V | TIGEQA-QRRGRVGR   |
| <b>Border DV</b> | FKQI--TLATGAGKTTE-LP   | KRVLVLIPLRAAAESV  | YIFLDEYH  | VVAMTATPA | LVFVPTRNM | VVATNAIESGVTL PDL D V V V  | TIGEQA-QRRGRVGR   |
| <b>BVDV (1)</b>  | FKQI--TLATGAGKTTE-LP   | KRVLVLIPLRAAAESV  | YIFLDEYH  | VVAMTATPA | LVFVPTRNM | VIVATNAIESGVTL PDL D T V I | TVGEQA-QRRGRVGR   |
| <b>BVDV (2)</b>  | FKQI--TLATGAGKTTE-LP   | KRVLVLIPLRAAAESV  | YIFLDEYH  | VVAMTATPA | LVFVPTRNM | VVVTNAIESGVTL PDL D T V V  | TIGEQA-QRRGRVGR   |
| <b>Bat Flavi</b> | FVL-----KCGAGKTRGV I K | VKVLVLPTRVV ANEA  | LIIVDESH  | VMYLTATGY | VYFVASGPE | LILTTNISEMGANY-NADIVM      | TVCTRA-SKI QRRGR  |

| RdRp      | Motif I | Motif II                          | Motif III      | Motif IV    | Motif V                       | Motif VI    | Motif VII | Motif VIII    |
|-----------|---------|-----------------------------------|----------------|-------------|-------------------------------|-------------|-----------|---------------|
|           | **      | * * *                             | *              | * *         | * * * *                       | ***         | *         |               |
| GBV-Amys  | VTKREV  | RKPPRFIVYP-PLDFRI--AEKM-ILGDPGIV  | LFQYTPNQRVKLL  | VDATCFDSSID | RKCRSSGVLTTSSANSITCYIKVKAA-C  | FFIAGDDCLI  | DTAECCSAY | WWLSTDMRKPLAR |
| GBV-Atri  | VTKREV  | RKPPRFICFP-PLDFRI--AEKM-ILGDPGLV  | LFQYTPNQRVKLM  | VDATCFDSSID | RKCRSSGVLTTSSANSITCYIKVKAA-A  | FLIAGDDCVI  | DTAECSSY  | WWLSTDMRKPLAR |
| GBV-Alab  | VTKREV  | RKPPRFIVFP-PLDFRI--AEKM-ILGDPGIV  | LFQYTPNQRVKAL  | VDATCFDSSID | RACRSSGVLTTSSANSXTCYIKXXAA-X  | FXIAGDDCLI  | DTAECCSAY | WWLSTDMRKPLAR |
| GBV-A     | VTKREV  | RKPPRFIVFP-PLDFRI--AEKM-ILGDPGIV  | LFQYTPNQRVKAL  | VDATCFDSSID | RQCRSSGVLTTSSANSITCYIKVSAA-C  | FFIAGDDCLI  | DTAECCSAY | WWLSTDMRKPLAR |
| GBV-B     | VPKEEV  | KKPPRLISYP-HLEMRC--VEKMYGQVAPDV   | GFVDPRTRVKRL   | CDTVCFDSTIT | RRCRSSGVYTTSSNSLTCWLKVNA-A    | FLICGDDCTV  | EELTSCSSN | YFLTRDPRIPLGR |
| GBV-C gt1 | TVKKEV  | EKAPRLIVFP-PLDFRI--AEKL-ILGDPGRV  | AFQYTPNQRVKKM  | VDATCFDSSIT | RYCRSSGVLTTSSANCLTCYIKVKAA-C  | LLIAGDDCLI  | DTAPFCSTW | FFLTTFDRRPLAR |
| GBV-C gt2 | TVKKEV  | EKAPRLIVFP-PLDFRI--AEKL-ILGDPGRV  | AFQYTPNQRVREM  | VDATCFDSSIT | RYCRSSGVLTTSSANCLTCYIKVKAA-C  | LLIAGDDGLI  | DTAPFCSTW | FFLTTFDRRPLAR |
| GBV-C gt3 | TVKKEV  | EKAPRLIVFP-PLDFRI--AEKL-ILGDPGRV  | AFQYTPNQRVKEM  | VDATCFDSSIT | RYCRSSGVLTTSSANCLTCYIKVKAA-C  | LLIAGDDCLI  | DTAPFCSTW | FFLTTFDRRPLAR |
| GBV-C gt4 | TVKKEV  | EKAPRLIVFP-PLDFRI--AEKL-ILGDPGRV  | AFQYTPNQRVKEM  | VDTCFDSSIT  | RYCRSSGVLTTSSANCLTCYIKVKAA-C  | LLIAGDDCLI  | DTAPFCSTW | FFLTTFDRRPLAR |
| GBV-C gt5 | TVKKEV  | EKAPRLIVFP-PLDFRI--AEKL-ILGDPGRV  | AFQYTPNQRVREM  | VDATCFDSSIT | RYCRSSGVLTTSSANCLTCYIKVKAA-C  | LLIAGDDCLI  | DTAPFCSTW | FFLTTFDRRPLAR |
| GBV-Ctrog | TVKKEV  | EKAPRLIVFP-PLDFRV--AEKM-IMGDPGRV  | AFQYTPNQRVKKM  | VDAKCFDSSIN | RFCRSSGVLTTSSNSCITCYIKVSAA-C  | LLIAGDDCLI  | DTAPFCSTW | FFLTTFDRRPLAR |
| GBV-D     | VTKDRK  | LKPPRLICY-P-SLEFRV--AEKM-ILGDPSVV | GFQYTPVQVRGFL  | VDAICFDSCIT | RACRASGVLTTSSNSCISFLKVSAA-C   | FLIHGDDVMI  | DTAQSCSAW | YFLSTDFRRVLAR |
| HCV gt1   | MAKNEV  | RKPARLIVYP-DLGVRV--CEKM-ALYDVTQK  | GFQYSPNQRVEYL  | YDTRCFDSTVT | RRCRASGVLPTSMGNTLTCYLKAQAA-C  | MLVCGDDLIV  | ELITSCSSN | YYLTRDCTTPLAR |
| HCV gt2   | MAKNEV  | KKPARLIVYP-DLGVRV--CEKM-ALYDITQK  | GFQYSPAQRVEYL  | YDTRCFDSTVT | RRCRASGVLTTSMGNTITCYVKALAA-C  | MLVCGDDLIV  | ELITSCSSN | YYLTRDPTTPLAR |
| HCV gt3   | MAKNEV  | RKPARLIVYP-DLGVRV--CEKR-ALYDVIQK  | GFQYSPQQRVERL  | YDTRCFDSTVT | RRCRASGVLPTSPGNTITCYIKATAA-A  | FLVCGDDLIV  | ELITSCSSN | YYLTRDATTPLAR |
| HCV gt4   | MAKNEV  | KKPARLIVYP-DLGVRV--CEKR-ALYDVAQK  | GFQYSPAQRVDFL  | YDTRCFDSTIT | RRCRASGVFTTSMGNTMTCYIKALAS-C  | LLVCGDDLVA  | ELVTSCSSN | YYLTRDPQVPLAK |
| HCV gt5   | MAKNEV  | RKPARLIVFP-DLGVRV--CEKM-ALYDVVTK  | GFQYSPGQRVEFL  | YDTRCFDSTVT | RRCRASGVLTTSCGNTLTCYIKARAA-C  | MLVCGDDLIV  | ELITSCSSN | YYLTRDPTTPLAR |
| HCV gt6   | MAKNEV  | RKPARLIVYP-DLGSRV--CEKR-ALHDVIKK  | GFQYSPAQRVEFL  | YDTRCFDSTVT | RRCRATGVYTTSPGNTLTCYLKATAA-I  | MLVCGDDLIV  | ELITSCSSN | YYLTRDPETPLAR |
| DV2       | MGKREK  | AKGSRAIWYMW-LGARFL-EFEA-LGFLNEDH  | VEGEGLHKLGYIL  | DDTAGWDTRIT | RDQRGSGQVGTGYGLNTFTNMQAQLIRQM | MAISGDDCVV  | TQVPFCSHH | VVPCRNQDELIGR |
| JEV       | MGKREK  | AKGSRAIWFWM-LGARYL-EFEA-LGFLNEDH  | VEGSGVQKLGYYL  | DDTAGWDTRIT | EDQRGSGQVVTYALNTFTNIQVQLVRLM  | MAISGDDCVV  | QQVPFCSNH | VVPCRGQDELIGR |
| WNV       | MGKREK  | AKGSRAIWYMW-LGARYL-EFEA-LGFLNEDH  | VEGIGLQYLGYVI  | DDTAGWDTRIT | RDQRGSGQVVTYALNTITNLKQQLIRMA  | MAVSGDDCVV  | ENVPFCSHH | VVPCREQDELIGR |
| YFV       | MGKREK  | AKGSRAIWYMW-LGSRFL-EFEA-LGFLNEDH  | VEGISLNYLGYL   | DDTAGWDTKVT | RDQRGSGQVVTYALNTLTIKQQLIRMM   | MLVSGDDCVV  | EEVPFCSHH | VVPCRDQDELVGR |
| TBEV      | MGKREK  | AKGSRAIWFMWLGARFLEFEALGFLNEDHWLG  | LGLQKLGYYLREV  | DDTAGWDTRIT | EDQRGSGQVVTYALNTFTNLAVQLVRMM  | MAVSGDDCVV  | QQVPFCSNH | VVPCRGQDELVGR |
| HogCV     | IPKNEK  | EKKPRVIQYP-EAKTRL--AITK-VMYKWVKQ  | EGKTPLFQIFDKV  | FDTKAWDTQVT | KGQRGSGQPDTSAAGNSMLNVLTMIIYAF | IHVCGDDGFL  | DDIEFCSHT | YMPGRNTTILAK  |
| Border DV | IPKNEK  | EKKPRVIQYP-EAKVRL--AITK-VMYKWVKQ  | EGKTPLFEIFDKV  | FDTKAWDTQVT | RGQRGSGQPDTSAAGNSMLNVLTMIIYAF | IHVCGDDGFL  | EDIEFCSHT | YMPGRNTATILAK |
| BVDV (1)  | IPKNEK  | EKRPRVIQYP-EAKTRL--AITK-VMYNWVKQ  | EGKTPLFNIFDKV  | FDTKAWDTQVT | NGQRGSGQPDTSAAGNSMLNVLTMIIYAF | IHVCGDDGFL  | EDIEFCSHT | HMAGRDTAVILSK |
| BVDV (2)  | IPKNEK  | EKKPRVIQYP-DAKVRL--AIAK-VMYKWVKQ  | EGKTPLFDIFDKV  | FDTKAWDTQVT | NGQRGSGQPDTSAAGNSMLNVLTMIIYAF | IHVCGDDGFL  | EDIEFCSHT | YMAGRSTATILAK |
| Bat Flavi | IGKKEK  | PKGSRLIMYLD-LVERFL-EHKY-LGFLNSDH  | SAVSPYEPYPRMIV | DDTAGWDTRLH | KGQRCSGTVVYTSMTNTITNTVVQMMRMQ | MMVSGDDCCLL | KDWKNISFC | WTLGKNEAEIIGK |

**Supplementary Fig. S1.** Alignment of the amino acid sequence of conserved regions of *Flaviviridae* helicase. Amino acid alignment of the six conserved motifs within the helicase coding region for representative virus species are shown with their GenBank accession numbers in parentheses: GB virus A (GBV-A<sub>myx</sub>) (AF023424), GBV-A<sub>iri</sub> (AF023425), GBV-A<sub>lab</sub> (U92241), GBV-A (U22303), GBV-B (NC\_001655), GBV-C genotype (gt) 1 (GBV-C gt1) (AB003291), GBV-C gt2 (AF081782), GBV-C gt3 (D90601), GBV-C gt4 (Ab021287), GBV-C gt5 (AY949771), GBV-C<sub>iro</sub> (AF70476), GBV-D (GU566735), hepatitis C virus (HCV) gt 1 (M62321), HCV gt 2 (AB047639), HCV gt 3 (D17763), HCV gt 4 (Y11604), HCV gt 5 (Y13184), HCV gt 6 (Y12083), dengue virus serotype 2 (DV2) (AF359579), Japanese encephalitis virus (JEV) (I78128), West Nile virus (WNV) (DQ211652), yellow fever virus (YFV) (U21055), tick-borne encephalitis virus (TBEV) (I40361), classical swine fever virus (HogCV) (D49532), border disease virus (border DV) (U70263), bovine viral diarrhoea virus (group 1) (BVDV [1]) (NC\_001461), BVDV (2) (U18059), and Entebbe bat virus (Bat; NC\_003996). Sequences were manually aligned using published helicase alignments of Koonin, as described in the text. \*conserved amino acids.

**Supplementary Fig. S2.** Alignment of the amino acid sequence of conserved regions of *Flaviviridae* RdRp. Amino acid alignment of conserved motifs within the RdRp coding region. *Flaviviridae* species and GenBank numbers are the same as listed in Fig. 2. Sequences were manually aligned using published RdRp alignments of Koonin, as described in the text. \* conserved amino acids.
